# Supplementary material
Source: MDPI journal article supplement (https://www.mdpi.com/2077-1312/10/5/624)
Supplement: s1 [file s1]

## SUPPORTING INFORMATION (SI)

### SI.1: Examples of preys found in the stomachs of *Coelorinchus caelorhinchus*

Examples of prey types found in the stomachs of a sample of *Coelorinchus caelorhinchus* from the bathyal plane of the Central Tyrrhenian Sea.

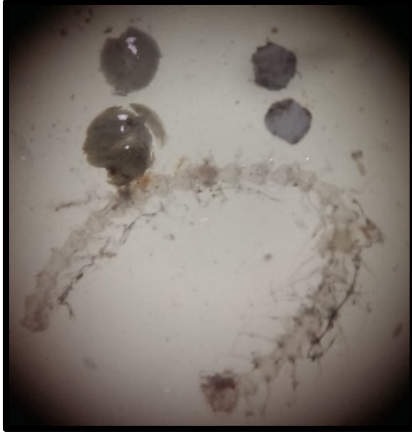

**Figure S1.** Fish remains; vertebral column, otoliths and eyes.

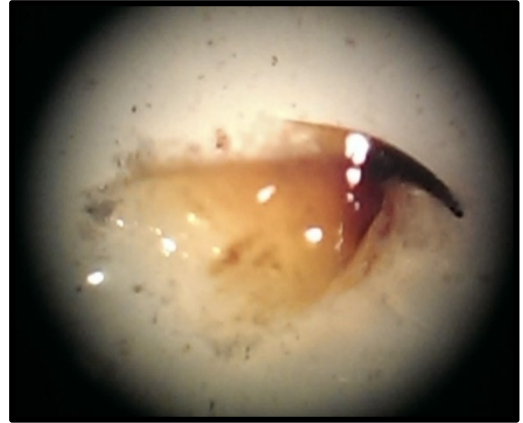

**Figure S2.** Cephalopod's beak.

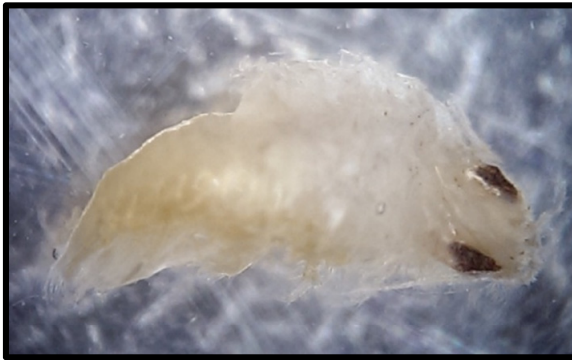

**Figure S3.** *Natatolana borealis* (Lilljeborg, 1851).

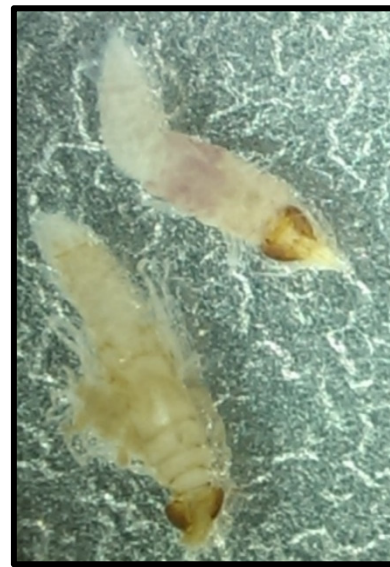

**Figure S4.** *Gnathia* sp. (praniza phase).

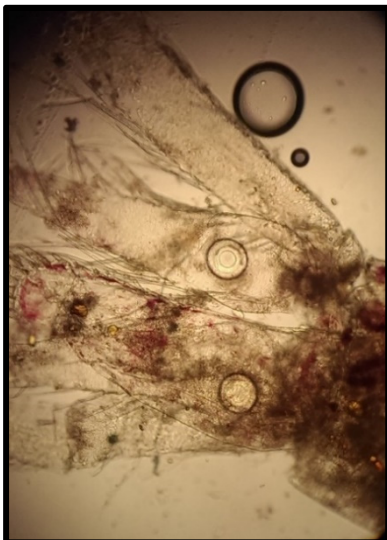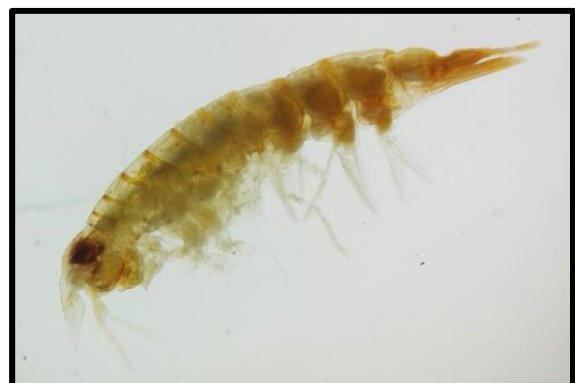

**Figure S5.** *Pseudomma* sp.

**Figure S6.** *Vibilia armata* Bovallius, 1887.

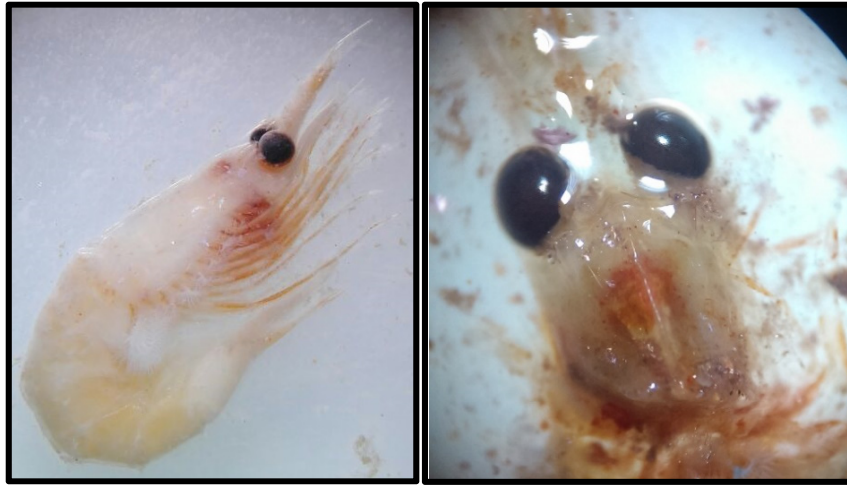

**Figure S7.** *Meganyctiphanes norvegica* (M. Sars, 1857).

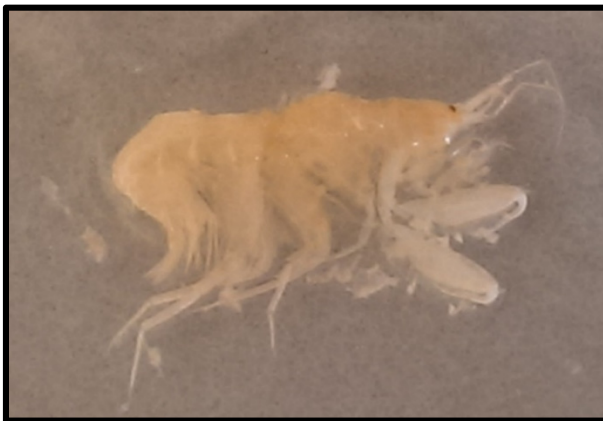

**Figure S8.** *Othomaera schmidtii* (Stephensen, 1915)

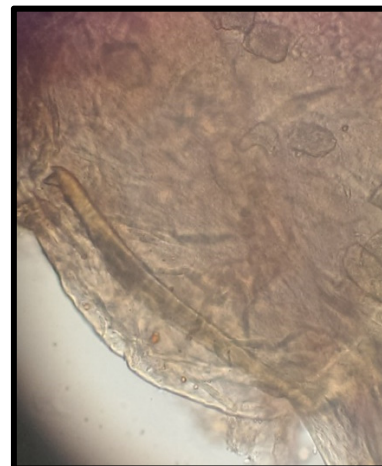

**Figure S9.** Acicular chaeta of Onuphid polychaete.

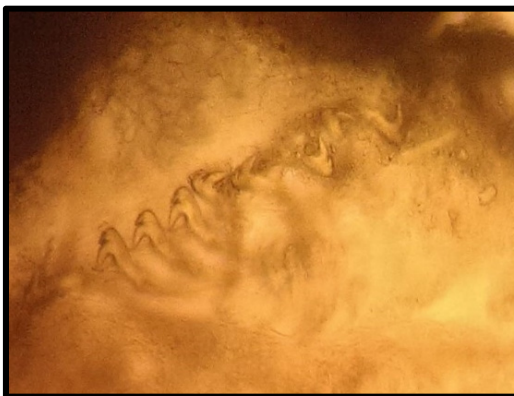

**Figure S10.** Thoracic uncini of *Trichobranchus* sp. polychaete.

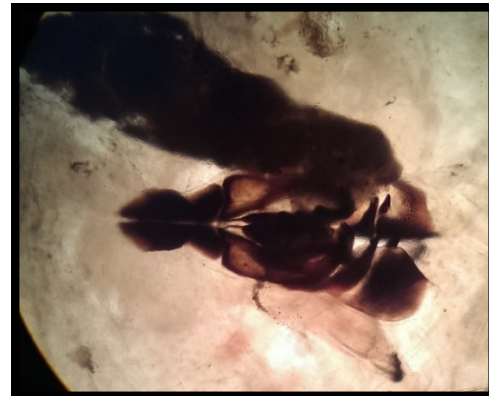

**Figure S11.** Maxillary apparatus of Lumbrinereid

## SI.2: Examples of preys and parasites found in the stomachs of *Galeus melastomus*

Examples of prey types and parasites found in the stomachs of a sample of *Galeus melastomus* from the bathyal plane of the Central Tyrrhenian Sea.

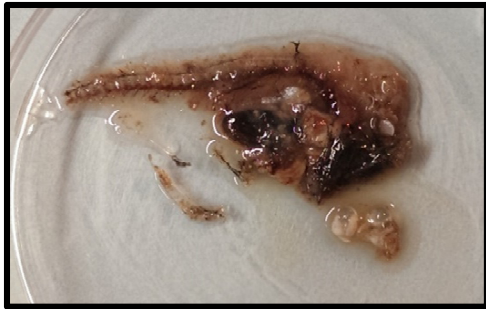

**Figure S12.** Fish remains.

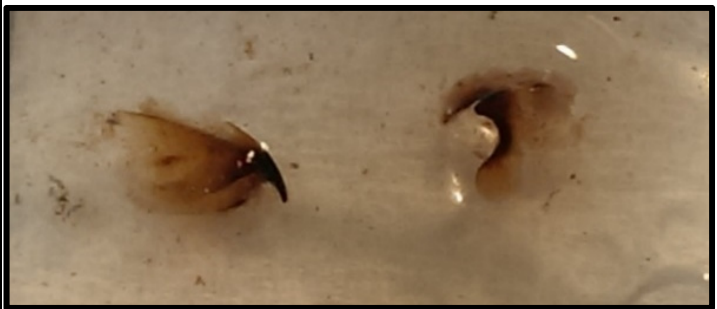

**Figure S13.** Cephalopoda Beaks.

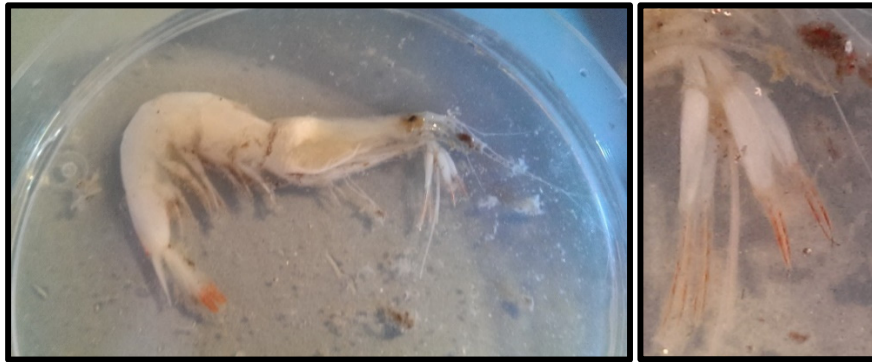

**Figure S14.** *Pasiphaea sivado* (Risso, 1816).

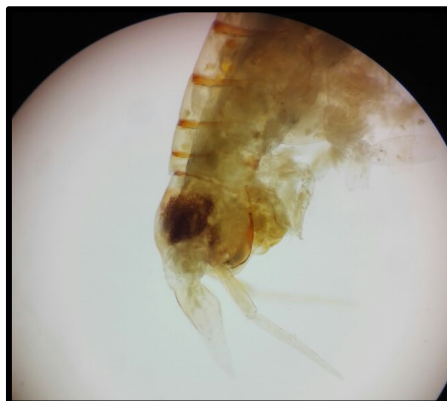

**Figure S15.** *Vibilia armata* Bovallius, 1887.

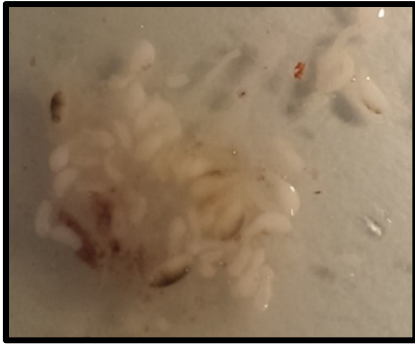

**Figure S16.** Cestoda.

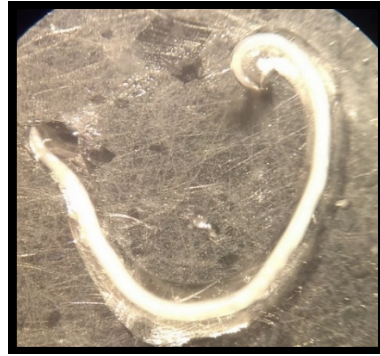

**Figure S17.** *Anisakis* sp.



### SI.3: Microplastics

#### SI.3.1: Microplastics found in the stomachs of *Coelorinchus caelorhinchus*

Examples of medium-sized microplastics filaments and fragments found in the stomachs of some specimens of *Coelorinchus caelorhinchus* (with code) from the bathyal plane of the Central Tyrrhenian Sea

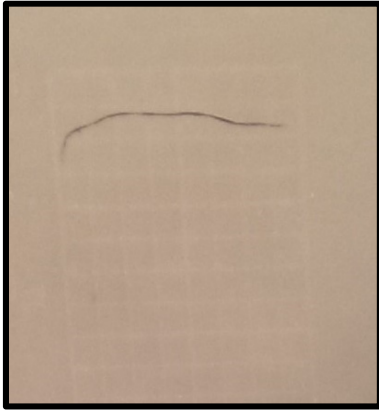

Figure S18. 7CCI

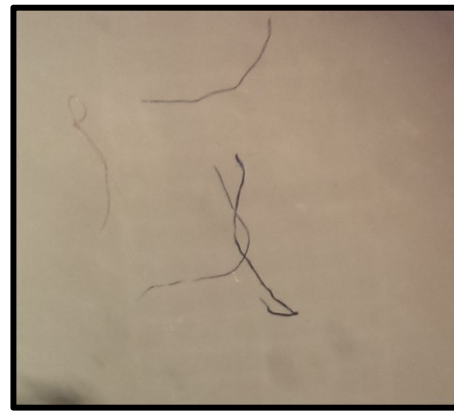

Figure S19. 26CCI

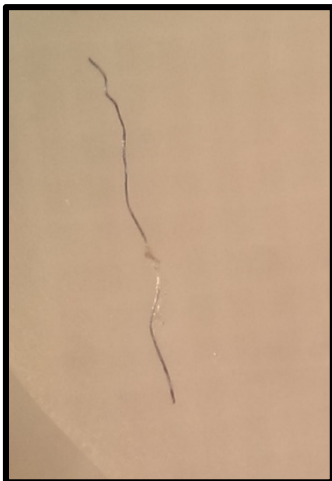

Figure S20. 6CCP

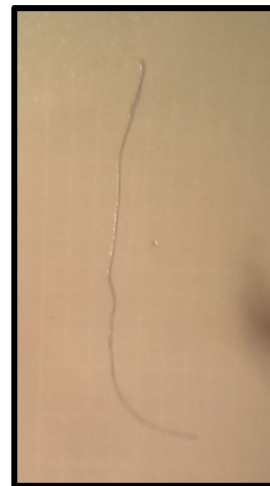

Figure S21. 4CCE

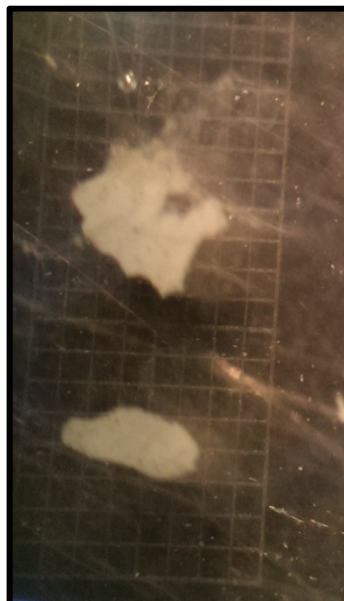

Figure S22. 11CCA

### SI.3.2: Microplastics found in the stomachs of *Galeus melastomus*

Examples of microplastics filaments, lamina and fragments ingested in some specimens (with code) of *Galeus melastomus* from the bathyal plane of the Central Tyrrhenian Sea

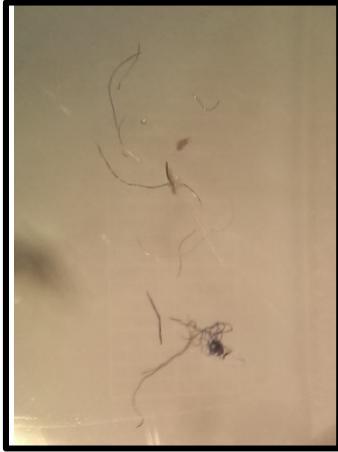

Figure S23. 6GMI

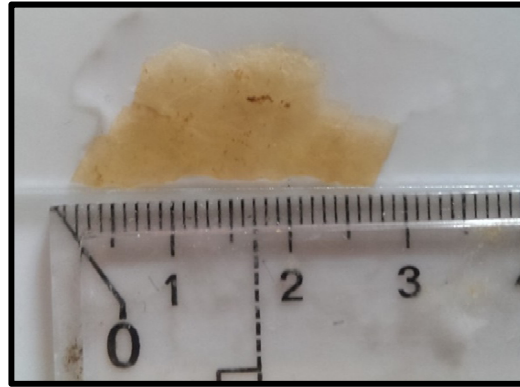

Figure S24. 27GMI

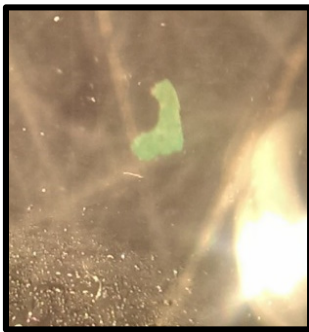

Figure S25. 42GMP  
23GME

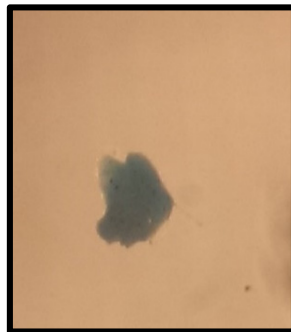

Figure S26. 6GME

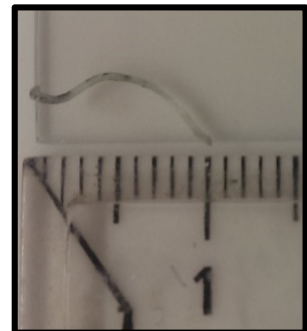

Figure S27.

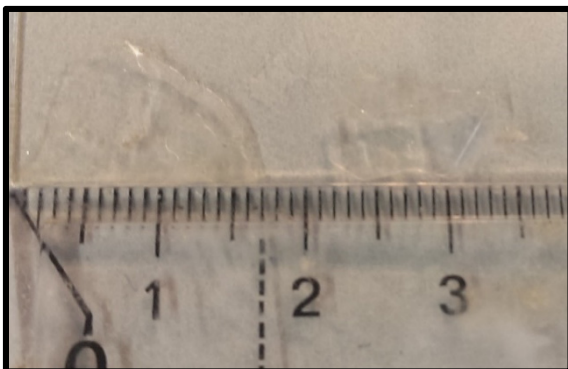

Figure S28. 29GME

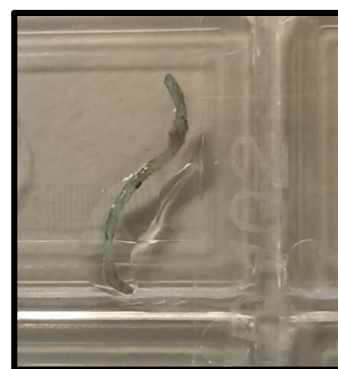

Figure S29. 18GMA

#### SI.4: Fishing data

**Table S1.** Fishing data concerning samples' collection in the eastern central Tyrrhenian Sea

| Haul's date | Trawler     | Starting time |            | Finishing time |            | Depth (m) | Meteo | Sea state |
|-------------|-------------|---------------|------------|----------------|------------|-----------|-------|-----------|
|             |             | Latitude      | Longitude  | Latitude       | Longitude  |           |       |           |
| 16/02/2017  | Crescenzo I | 42 04608 N    | 11 12058 E | 42 01140 N     | 11 31385 E | 250-400   | 7/8   | Calm      |
| 06/06/2017  | Crescenzo I | 42 05945 N    | 11 21210 E | 42 03406 N     | 11 27395 E | 260-380   | 5/6   | Calm      |
| 18/07/2017  | Crescenzo I | 42 05931 N    | 11 34252 E | 42 06664 N     | 11 20846 E | 260-390   | 0     | Calm      |
| 08/11/2017  | Crescenzo I | 42 02025 N    | 11 32450 E | 42 57263 N     | 11 16743 E | 250-415   | 5/6   | Calm      |

#### SI.5: Dietary data

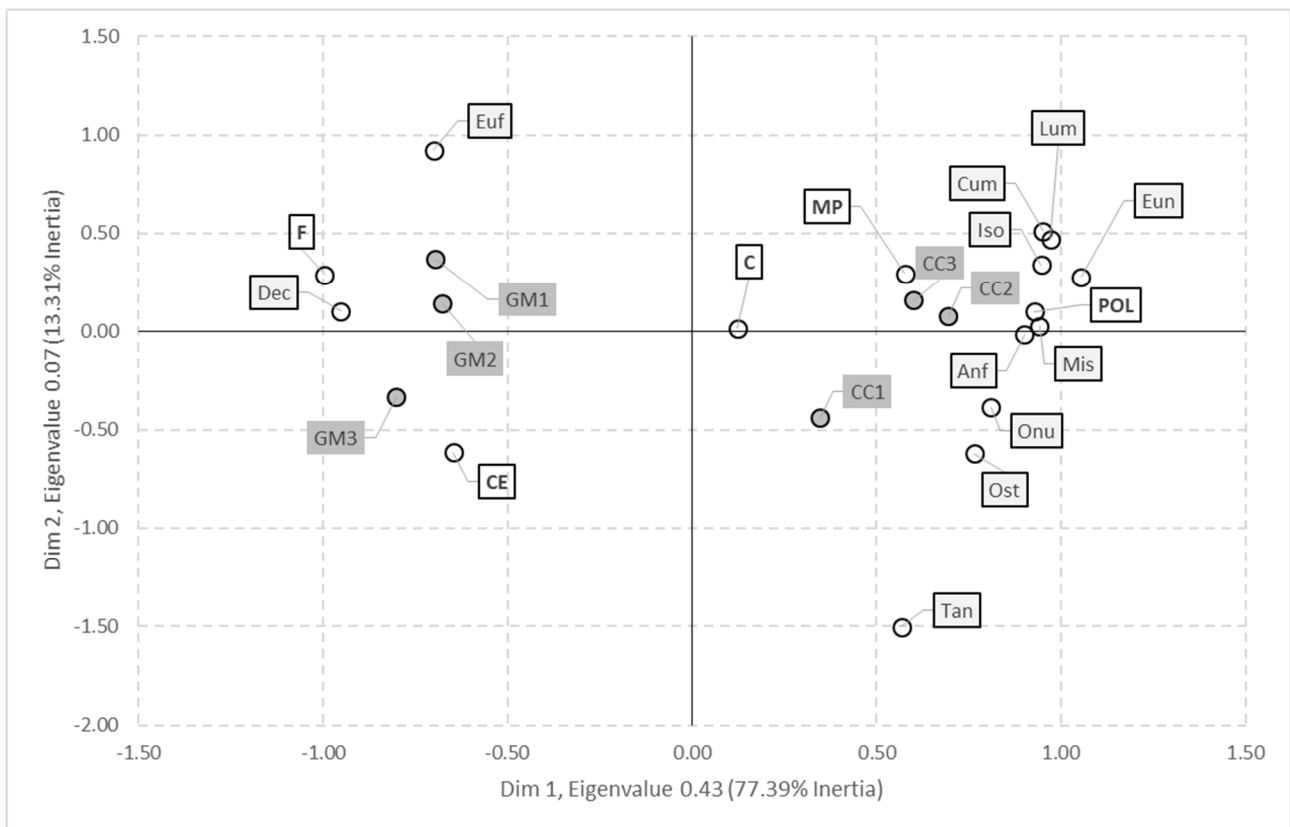

**Figure S30.** Biplot from Correspondence Analysis representing prey composition in the diet of two generalistic and opportunistic deep-water predators *Coelorhynchus caelorhynchus* (CC) and *Galeus melastomus* (GM) from the bathyal plane of the Central Tyrrhenian Sea and according to three size classes (1, 2 and 3). C: total crustaceans; POL: total polychaetes; F: bony fishes; CE: cephalopods; MP: microplastics. Dec: Decapoda; Euf: Euphysiacea; Tan: Tanaidacea; Ost: Ostracoda; Anf: Anfiboda; Mis: Misidacea; Iso: Isopoda; Cum: Cumacea; Onu: Onuphidae; Eun: Eunicidae; Lum: Lumbrineridae. The two dimensions explaining the most of cumulated variance were interpreted as describing an ontogenic (Dim 2) and prey importance (Dim 1) gradients, respectively.

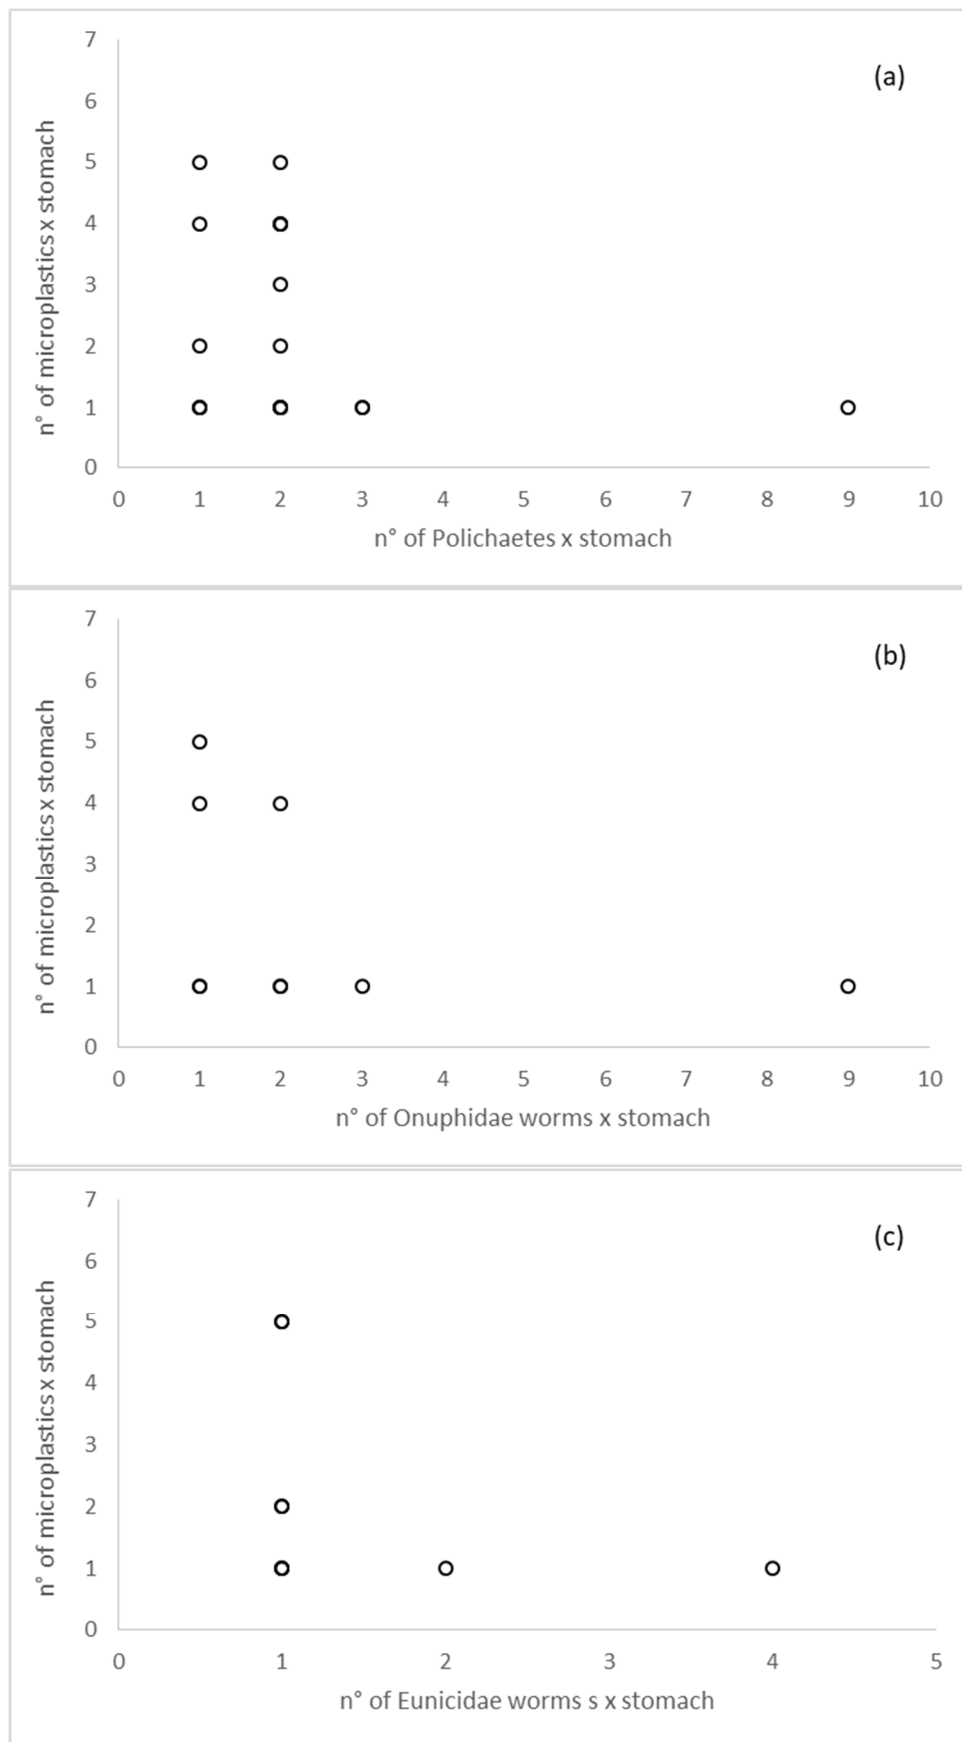

**Figure S31.** a, b, c. Relationships between number of ingested microplastics and increasing number of ingested total polychaetes (a), Onufphidae (b) and Eunicidae (c) families by individual stomach from a sample of



*Coelorinchus caelorhincus* from the bathyal plane of the Central Tyrrhenian Sea; inverse gamma correlation are at borderline p-level of significance ( $r=-0.31$ ,  $p=0.06$ ) for total polychaetes and significant for Onuphiidae ( $r=-0.69$ ,  $p<0.05$ ) and Eunicidae ( $r=-1$ ,  $p<0.05$ ).
